# Supplementary material
Source: PubMed Central journal article supplement (PMC4142794)
Supplement: Supp_Fig1.pdf [file Supp_Fig1.pdf]

## Supplementary Data

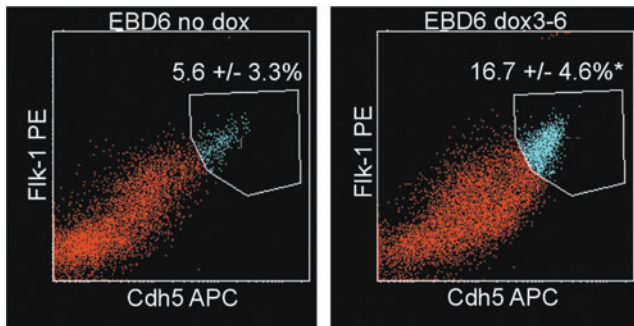

**SUPPLEMENTARY FIG. S1.** Embryonic bodies (EBs) were prepared using ETV2 over-expressing mES cells and cultured for 6 days. Dox was added for 72 h (days 3–6). FACS analysis of FLK1<sup>+</sup>/CDH5<sup>+</sup> double-positive EPCs derived from EBs at day 6 showed a significant increase in ETV2 over-expressing EBs (\* $P < 0.05$ ,  $n = 7$ ).
