# Supplementary material
Source: PubMed Central journal article supplement (PMC4142794)
Supplement: Supp_Fig2.pdf [file Supp_Fig2.pdf]

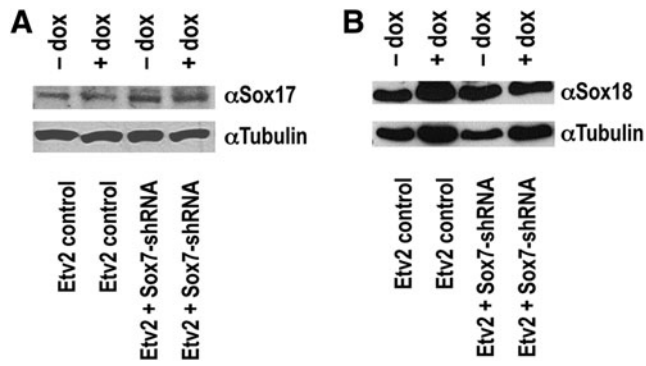

**SUPPLEMENTARY FIG. S2.** EBs were prepared using ETV2 over-expressing mES cells containing lentivirus constitutively expressing shRNA for *Sox7* or control. Dox was added for 72 h (days 3–6) and EBs cultured for 6 days. Western blot analysis in EBs collected on day 6. Closely related *Sox-F* family member SOX17 (**A**) or SOX18 (**B**) protein levels were analyzed by western analysis. No decrease in SOX17 or SOX18 was detected, indicating knockdown specificity of the *Sox7* shRNA to *Sox7*.
